# Supplementary material for: The facile synthesis of core–shell PtCu nanoparticles with superior electrocatalytic activity and stability in the hydrogen evolution reaction
Source: Royal Society of Chemistry journal article supplement (doi:10.1039/d1ra04001d), 2021-01-01
Supplement: d1ra04001d1.pdf [file d1ra04001d1.pdf]

# **Facile Synthesis of Core-Shell PtCu Nanoparticles with Superior Electrocatalytic Activity and Stability in Hydrogen Evolution Reaction**

Yongxiao Tuo<sup>1,\*</sup>, Qing Lu<sup>2</sup>, Chen Chen<sup>2</sup>, Tenglong Liu<sup>2</sup>, Yuan Pan<sup>2</sup>, Yan Zhou<sup>1</sup>, Jun Zhang<sup>1,2,\*</sup>

*1 School of Materials Science and Engineering, China University of Petroleum (East China), Qingdao, 266580, CHINA*

*2 State Key Laboratory of Heavy Oil Processing, China University of Petroleum (East China), Qingdao, 266580, CHINA*

Corresponding Author:

Yongxiao Tuo: [yxtuo@upc.edu.cn](mailto:yxtuo@upc.edu.cn)

Jun Zhang: [zhangj@upc.edu.cn](mailto:zhangj@upc.edu.cn)

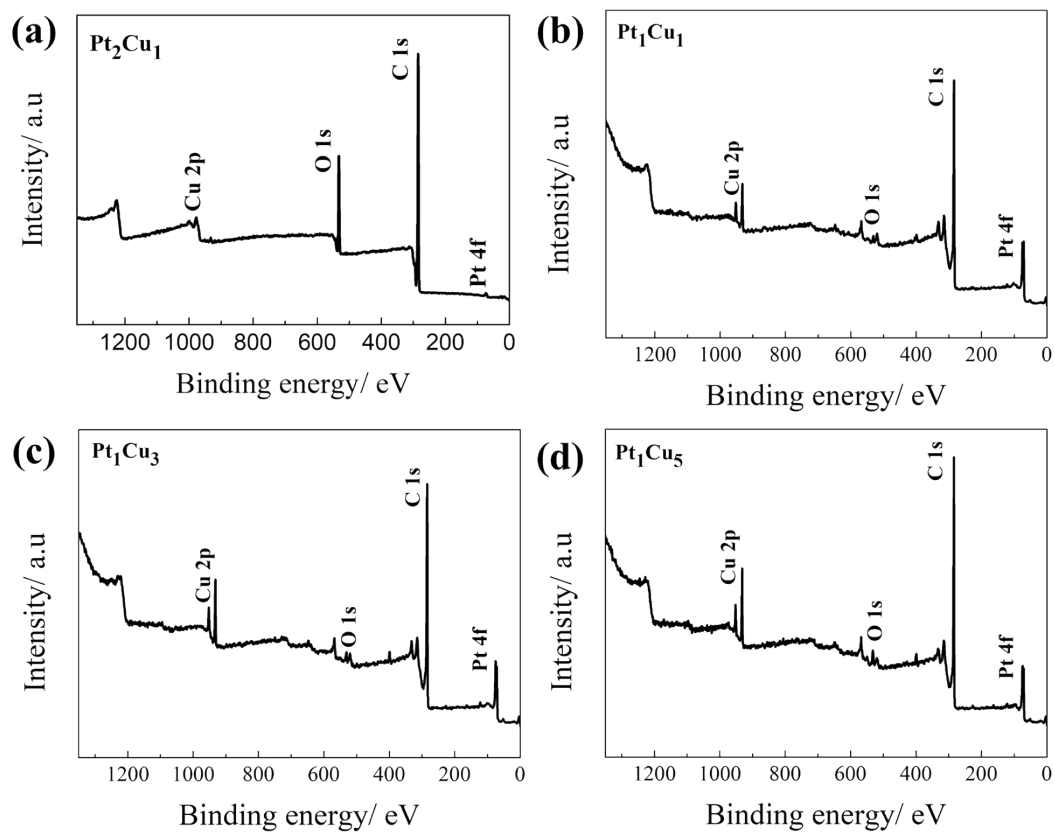

Figure S1 XPS wide-scan spectra of PtCu NPs.

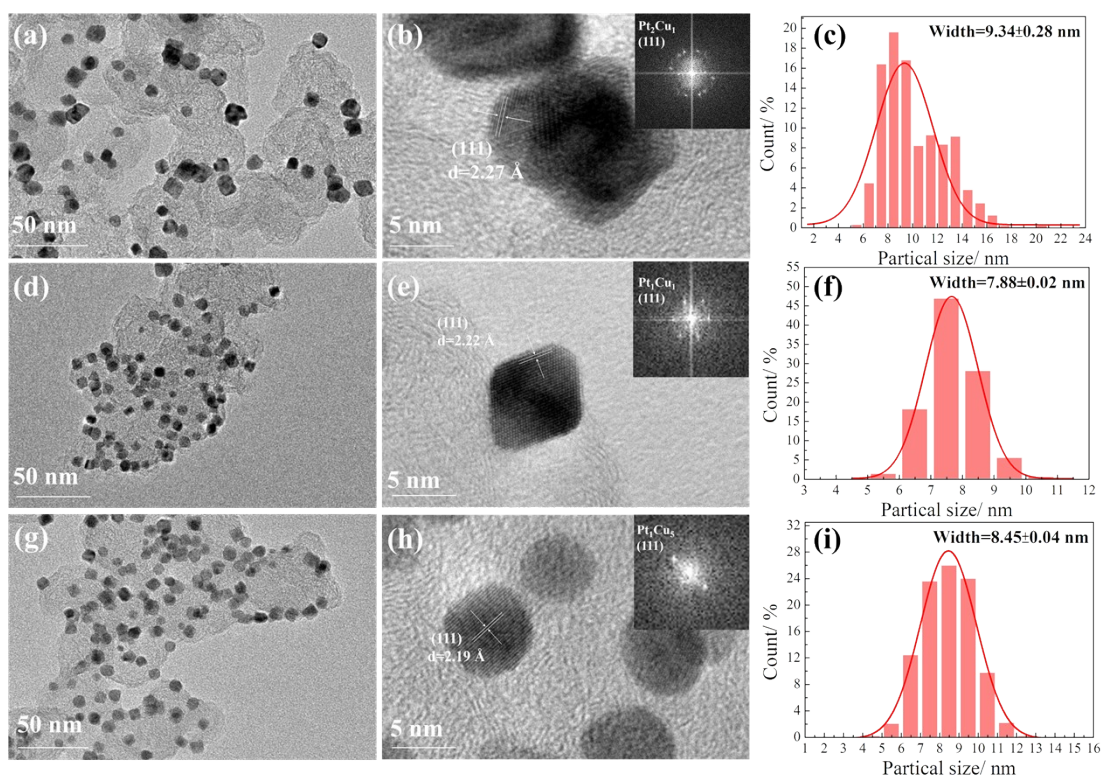

Figure S2 (a, d, g) TEM images, (b, e, h) HRTEM images and (c, f, i) particle size distribution histograms of PtCu NPs with different Pt/Cu ratio. The insertions in (b, e, h) display the FFT images of PtCu NPs.

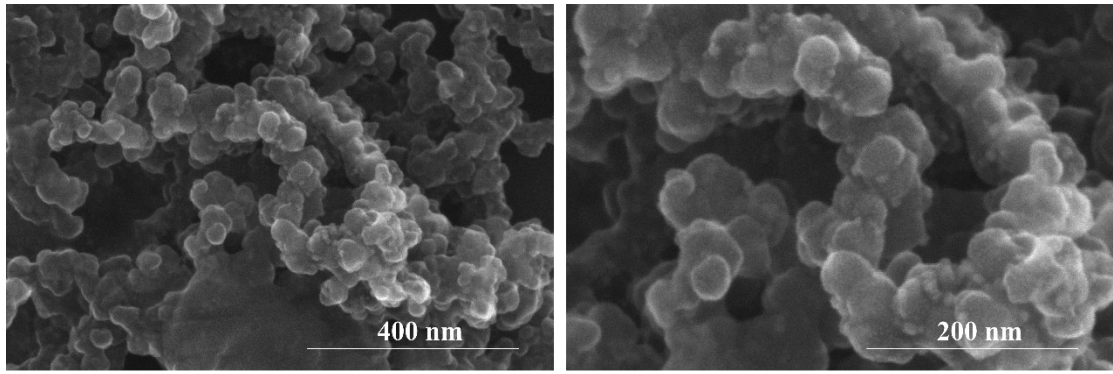

Figure S3 SEM images of Pt<sub>1</sub>Cu<sub>3</sub>/CB catalyst.

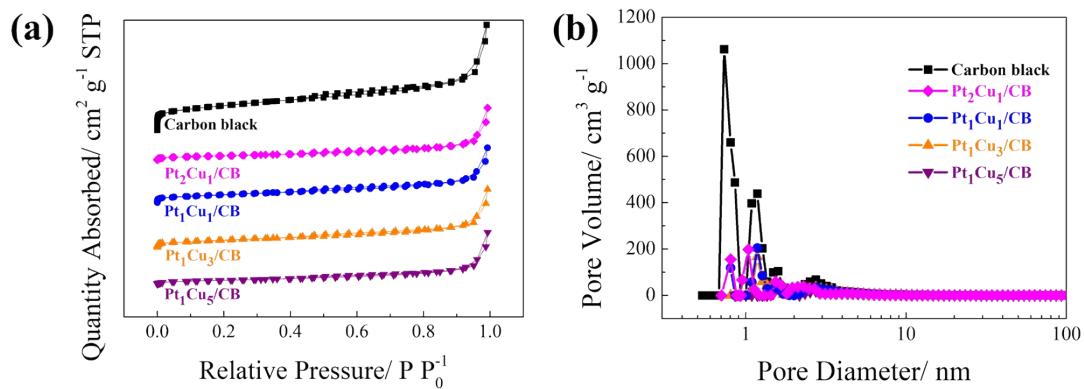

Figure S4 Nitrogen ad/desorption isotherms (a) and pore-size distribution curves (b) of carbon black and PtCu/CB samples.

Table S1 Pt/Cu mass ratio determined by ICP-OES and XPS.

| Samples                             | ICP-OES   | XPS       |
|-------------------------------------|-----------|-----------|
| Pt <sub>2</sub> Cu <sub>1</sub> /CB | 82.9:17.1 | 62.6:37.4 |
| Pt <sub>1</sub> Cu <sub>1</sub> /CB | 50.4:49.6 | 83.4:16.6 |
| Pt <sub>1</sub> Cu <sub>3</sub> /CB | 45.1:54.9 | 75.5:24.5 |
| Pt <sub>1</sub> Cu <sub>5</sub> /CB | 44.3:55.7 | 70.2:29.8 |

Table S2 Textural properties of as-synthesized PtCu/CB catalysts.

| Samples                             | $S_{\text{BET}}$<br>$\text{m}^2 \text{g}^{-1}$ | External surface<br>$\text{m}^2 \text{g}^{-1}$ | BJH average<br>pore size<br>nm | Total pore<br>volume of pores<br>$\text{cm}^3 \text{g}^{-1}$ |
|-------------------------------------|------------------------------------------------|------------------------------------------------|--------------------------------|--------------------------------------------------------------|
| Carbon black                        | 815.19                                         | 706.81                                         | 9.60                           | 0.84                                                         |
| Pt <sub>2</sub> Cu <sub>1</sub> /CB | 277.15                                         | 299.71                                         | 13.98                          | 0.37                                                         |
| Pt <sub>1</sub> Cu <sub>1</sub> /CB | 285.81                                         | 318.57                                         | 11.41                          | 0.37                                                         |
| Pt <sub>1</sub> Cu <sub>3</sub> /CB | 267.71                                         | 309.03                                         | 12.34                          | 0.37                                                         |
| Pt <sub>1</sub> Cu <sub>5</sub> /CB | 231.26                                         | 282.02                                         | 18.66                          | 0.27                                                         |

Table S3 XPS parameters of Pt 4f.

| Sample                              | Pt 4f <sub>7/2</sub> |         |                  |         | Pt 4f <sub>5/2</sub> |         |                  |         |
|-------------------------------------|----------------------|---------|------------------|---------|----------------------|---------|------------------|---------|
|                                     | Pt <sup>0</sup>      |         | Pt <sup>II</sup> |         | Pt <sup>0</sup>      |         | Pt <sup>II</sup> |         |
|                                     | B.E., eV             | Area, % | B.E., eV         | Area, % | B.E., eV             | Area, % | B.E., eV         | Area, % |
| Pt <sub>2</sub> Cu <sub>1</sub> /CB | 71.044               | 19.5    | 71.777           | 9.5     | 74.542               | 34.1    | 75.513           | 36.9    |
| Pt <sub>1</sub> Cu <sub>1</sub> /CB | 71.129               | 34.9    | 72.009           | 11.9    | 74.499               | 27.7    | 75.359           | 25.5    |
| Pt <sub>1</sub> Cu <sub>3</sub> /CB | 71.198               | 31.1    | 72.145           | 9.7     | 74.565               | 27.0    | 75.495           | 32.2    |
| Pt <sub>1</sub> Cu <sub>5</sub> /CB | 71.112               | 31.2    | 72.094           | 12.1    | 74.502               | 27.7    | 75.444           | 29.0    |

Table S4 XPS parameters of Cu 2p.

| Sample                              | Cu 2p <sub>3/2</sub> |         |                  |         | Cu 2p <sub>1/2</sub> |         |                  |         |
|-------------------------------------|----------------------|---------|------------------|---------|----------------------|---------|------------------|---------|
|                                     | Cu <sup>0</sup>      |         | Cu <sup>II</sup> |         | Cu <sup>0</sup>      |         | Cu <sup>II</sup> |         |
|                                     | B.E., eV             | Area, % | B.E., eV         | Area, % | B.E., eV             | Area, % | B.E., eV         | Area, % |
| Pt <sub>2</sub> Cu <sub>1</sub> /CB | 932.536              | 35.4    | 934.030          | 32.7    | 951.477              | 16.0    | 953.073          | 15.9    |
| Pt <sub>1</sub> Cu <sub>1</sub> /CB | 932.216              | 54.5    | 933.650          | 10.9    | 951.966              | 27.7    | 954.069          | 6.9     |
| Pt <sub>1</sub> Cu <sub>3</sub> /CB | 932.122              | 44.4    | 933.012          | 20.5    | 951.872              | 20.4    | 953.078          | 14.7    |
| Pt <sub>1</sub> Cu <sub>5</sub> /CB | 932.151              | 45.6    | 932.969          | 19.4    | 951.901              | 20.4    | 953.075          | 14.6    |



Table S5 Comparison of onset potential, overpotential, current densities, and Tafel slope value of various samples in 0.5M H<sub>2</sub>SO<sub>4</sub>.

| Samples                             | E <sub>onset</sub> , mV | Tafel slope,<br>mV dec <sup>-1</sup> | η@j=10 mA·cm <sup>-2</sup> ,<br>mV | η@j=50 mA cm <sup>-2</sup> ,<br>mV |
|-------------------------------------|-------------------------|--------------------------------------|------------------------------------|------------------------------------|
| 20% Pt/C                            | 0                       | 21.89                                | 21.2                               | 58.6                               |
| 10% Pt/C                            | -5                      | 36.80                                | 60.1                               | 117.1                              |
| Pt <sub>2</sub> Cu <sub>1</sub> /CB | -15                     | 55.01                                | 50.6                               | 111.6                              |
| Pt <sub>1</sub> Cu <sub>1</sub> /CB | -12                     | 51.56                                | 40.5                               | 104.1                              |
| Pt <sub>1</sub> Cu <sub>3</sub> /CB | 0                       | 26.28                                | 10.5                               | 29.7                               |
| Pt <sub>1</sub> Cu <sub>5</sub> /CB | -10                     | 34.59                                | 20.9                               | 49.5                               |

Table S6 Comparison of onset potential, overpotential, current densities, and Tafel slope value of various samples in 1.0M KOH.

| Samples                             | E <sub>onset</sub> , mV | Tafel slope,<br>mV dec <sup>-1</sup> | η@j=10 mA·cm <sup>-2</sup> ,<br>mV | η@j=50 mA cm <sup>-2</sup> ,<br>mV |
|-------------------------------------|-------------------------|--------------------------------------|------------------------------------|------------------------------------|
| 10% Pt/C                            | -2                      | 45.76                                | 39                                 | 130                                |
| Pt <sub>2</sub> Cu <sub>1</sub> /CB | -16                     | 42.54                                | 16                                 | 101                                |
| Pt <sub>1</sub> Cu <sub>1</sub> /CB | -27                     | 42.73                                | 56                                 | 131                                |
| Pt <sub>1</sub> Cu <sub>3</sub> /CB | -11                     | 76.87                                | 17                                 | 115                                |
| Pt <sub>1</sub> Cu <sub>5</sub> /CB | -10                     | 139.49                               | 30                                 | 168                                |

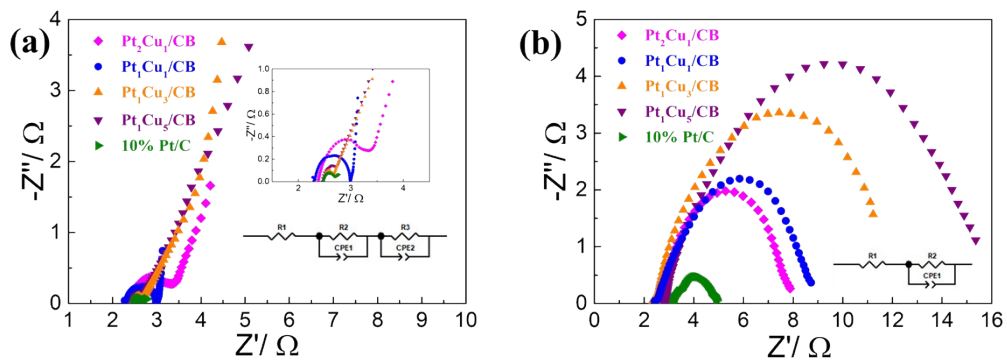

Figure S5 The EIS Nyquist plots of PtCu/CB and 10% Pt/C samples (a) in 0.5M  $H_2SO_4$  at -0.223 V (vs. RHE) and (b) in 1.0M KOH at -0.010 V (vs. RHE).

Table S7 Comparison of HER performance of Pt-based catalysts in acid and alkaline electrolytes.

| Electrolyte                    | Catalyst                              | Mass activity @-50<br>mV,<br>A mg <sub>Pt</sub> <sup>-1</sup> | E <sub>onset</sub> ,<br>mV | Tafel slope,<br>mV dec <sup>-1</sup> | η@j=10 mA·cm <sup>-2</sup> ,<br>mV       | Reference |
|--------------------------------|---------------------------------------|---------------------------------------------------------------|----------------------------|--------------------------------------|------------------------------------------|-----------|
| H <sub>2</sub> SO <sub>4</sub> | Pt <sub>1</sub> Cu <sub>3</sub> /CB   | 1.1154                                                        | 0                          | 26.28                                | 10                                       | This work |
|                                | 20% Pt/C                              | 0.2067                                                        | 0                          | 21.89                                | 21.2                                     | This work |
|                                | 10% Pt/C                              | 0.0543                                                        | -5                         | 36.80                                | 60.1                                     | This work |
|                                | PtCu DNFs                             | 0.2523                                                        | 0                          | 34                                   | 27                                       | [1]       |
|                                | PtCu NPHs                             | 0.0332                                                        | 21                         | 49                                   | 66                                       | [1]       |
|                                | Pt CNFs                               | -                                                             | -                          | 40                                   | -                                        | [2]       |
|                                | PdCo@CN                               | -                                                             | -                          | 31                                   | 80                                       | [3]       |
|                                | Cu-Pt                                 | -                                                             | -0.01                      | -                                    | j= -2.75 mA cm <sup>-2</sup><br>@ -0.5 V | [4]       |
|                                | Cu@Pt/4-<br>Sulfophenyl/GC            | 28                                                            | -                          | -                                    | -                                        | [5]       |
|                                | Pt <sub>1</sub> Cu <sub>1.03</sub> -D | 19.34@-0.2V                                                   | -                          | 28.5                                 | 20                                       | [6]       |
|                                | Pd@PtCu/C                             | -                                                             | -                          | 26.2                                 | 19                                       | [7]       |
|                                | PtNi                                  | -                                                             | -380                       | 119                                  | -                                        | [8]       |
|                                | Pt <sub>24</sub> Cu <sub>76</sub> NFs | 0.74@-0.9V                                                    | -                          | 52                                   | 18                                       | [9]       |
| Pt-WC-<br>1,10/BMZ             | 6.659@-0.033V                         | -                                                             | 40.1                       | 23                                   | [10]                                     |           |
| KOH                            | Pt <sub>1</sub> Cu <sub>3</sub> /CB   | 0.2141                                                        | 0                          | 122.34                               | 17                                       | This work |
|                                | 10 % Pt/C                             | 0.1375                                                        | -5                         | 87.70                                | 39                                       | This work |
|                                | PtCu NPHs                             | 0.0470                                                        | -3                         | 76                                   | 61                                       | [1]       |
|                                | PtCu DNFs                             | 0.1503                                                        | 0                          | 55                                   | 36                                       | [1]       |
|                                | PdCo@CN                               | -                                                             | -                          | -                                    | 250                                      | [3]       |
|                                | Cu@Ni                                 | -                                                             | -                          | 79                                   | 140                                      | [11]      |



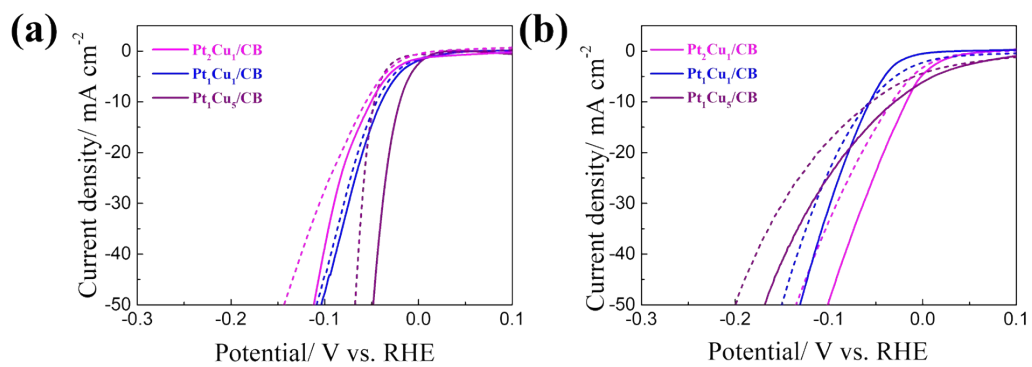

Figure S6 HER polarization curves of PtCu/CB catalysts before and after 1000 cycles in (a) 0.5M H<sub>2</sub>SO<sub>4</sub> and in (c) 1.0M KOH.

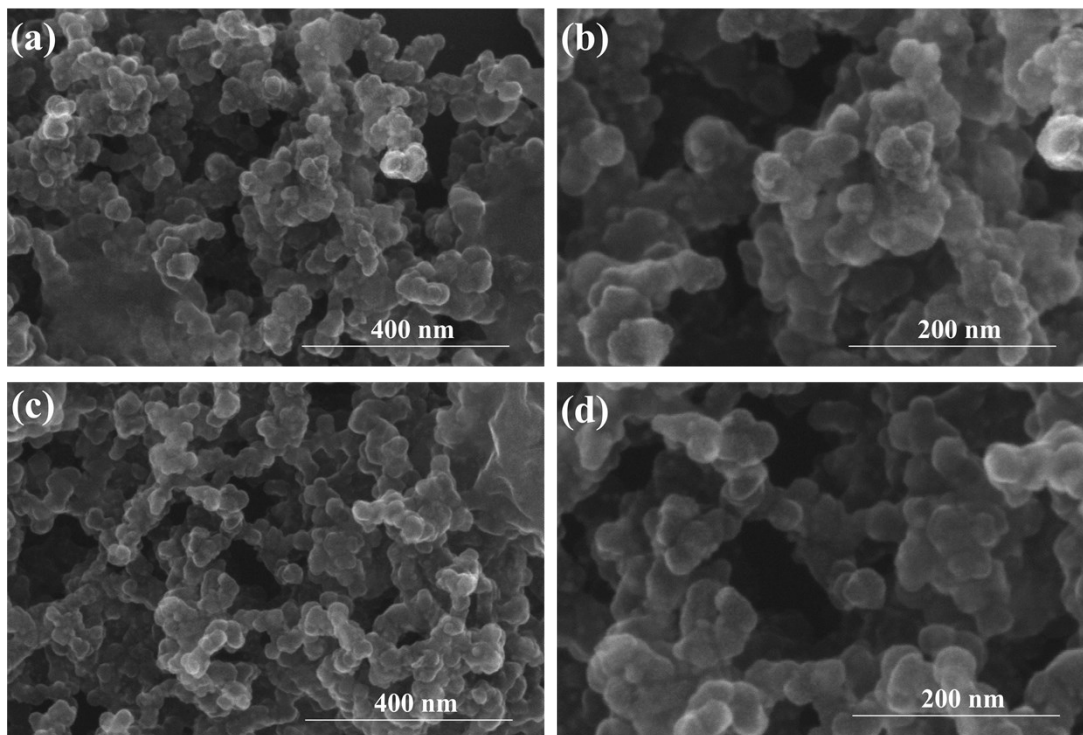

Figure S7 SEM images of  $\text{Pt}_1\text{Cu}_3/\text{CB}$  catalyst after (a, b) 9 h alkaline HER and (c, d) 24 h acidic HER stability test.

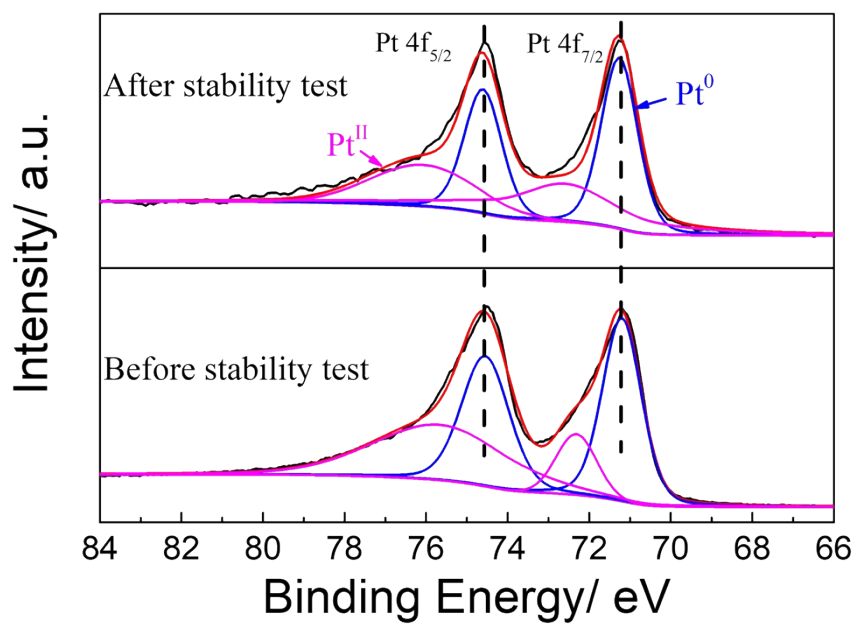

Figure S8 Comparison of Pt 4f XPS spectra between the as-prepared Pt<sub>1</sub>Cu<sub>3</sub>/CB catalyst and the corresponding one after 9 h alkaline HER stability test.

## Reference

- [1] Zhang, X. F., et al., *Solvothermal synthesis of monodisperse PtCu dodecahedral nanoframes with enhanced catalytic activity and durability for hydrogen evolution reaction*. ACS Applied Energy Materials, 2018. **1**(9): p. 5054-5061.
- [2] Ghasemi, S., S.R. Hosseini, and S. Nabipour, *Preparation of nanohybrid electrocatalyst based on reduced graphene oxide sheets decorated with Pt nanoparticles for hydrogen evolution reaction*. Journal of the Iranian Chemical Society, 2019. **16**(1): p. 101-109.
- [3] Chen, J., et al., *Active and durable hydrogen evolution reaction catalyst derived from Pd-doped metal–organic frameworks*. ACS applied materials & interfaces, 2016. **8**(21): p. 13378-13383.
- [4] Mandegarzad, S., et al., *Cu-Pt bimetallic nanoparticles supported metal organic framework-derived nanoporous carbon as a catalyst for hydrogen evolution reaction*. Electrochimica Acta, 2016. **190**: p. 729-736.
- [5] Mirzaei, P., et al., *Bimetallic Cu–Rh Nanoparticles on Diazonium-Modified Carbon Powders for the Electrocatalytic Reduction of Nitrates*. Langmuir, 2019. **35**(45): p. 14428-14436.
- [6] Jia, Y., et al., *Sandwich-Type Electrochemical Immunosensor Based on Signal Amplification System of Porous PtCu Decorated FCuS Nanospheres for CEA Detection*. Journal of The Electrochemical Society, 2019. **166**(8): p. B713-B719.
- [7] Bao, M., et al., *Surface evolution of PtCu alloy shell over Pd nanocrystals leads to superior hydrogen evolution and oxygen reduction reactions*. ACS Energy Letters, 2018. **3**(4): p. 940-945.
- [8] Zheng, J., *Seawater splitting for high-efficiency hydrogen evolution by alloyed PtNix electrocatalysts*. Applied Surface Science, 2017. **413**: p. 360-365.
- [9] Huang, X.-Y., et al., *L-proline assisted solvothermal preparation of Cu-rich rhombic dodecahedral PtCu nanoframes as advanced electrocatalysts for oxygen reduction and hydrogen evolution reactions*. Electrochimica Acta, 2019. **299**: p. 89-97.
- [10] Chen, X., et al., *Coupling low platinum and tungsten carbide supported on ZIFs-Derived porous carbon for efficient hydrogen evolution*. Electrochimica Acta, 2019. **328**: p. 135077.
- [11] Li, Z., et al., *Mesoporous Hollow Cu–Ni Alloy Nanocage from Core–Shell Cu@ Ni Nanocube for Efficient Hydrogen Evolution Reaction*. ACS Catalysis, 2019. **9**(6): p. 5084-5095.
